# Supplementary material for: A triphenylamine-based colorimetric and “turn-on” fluorescent probe for detection of cyanide anions in live cells
Source: Royal Society of Chemistry journal article supplement (doi:10.1039/c5ra05807d), 2015-01-01
Supplement: c5ra05807d1.pdf [file c5ra05807d1.pdf]

**Support Information for:**

**A triphenylamine-based colorimetric and “turn-on”  
fluorescent probe for live-cell detection of cyanide anion**

Shaodan Wang,<sup>a</sup> Hai Xu,<sup>a</sup> Qingbiao Yang,<sup>\*a</sup> Yan Song,<sup>\*b</sup> and Yaoxian Li<sup>a</sup>

<sup>a</sup> *Department of Chemistry, Jilin University, Changchun 130021, P. R. China.*

*Fax: +86-431-88499576; Tel: +86-431-88499576;*

*E-mail: [yangqb@jlu.edu.cn](mailto:yangqb@jlu.edu.cn).*

<sup>b</sup> *College of Materials Science and Engineering, Jilin University of Chemical*

*Technology, Jilin 132022, PR China. Fax: +86-432- 63083094;*

*E-mail: [songyan199809@163.com](mailto:songyan199809@163.com).*

## 1、 Characterization of the compounds

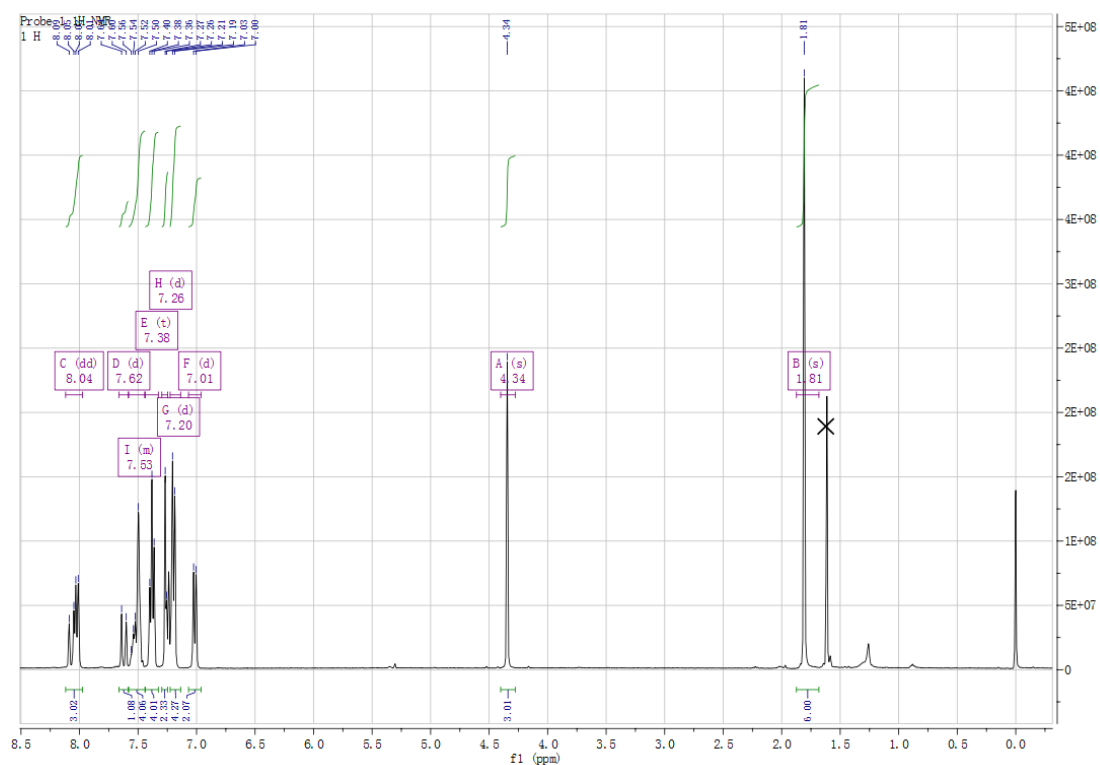

Fig. S1. <sup>1</sup>H NMR spectrum of probe 1 in CDCl<sub>3</sub>.

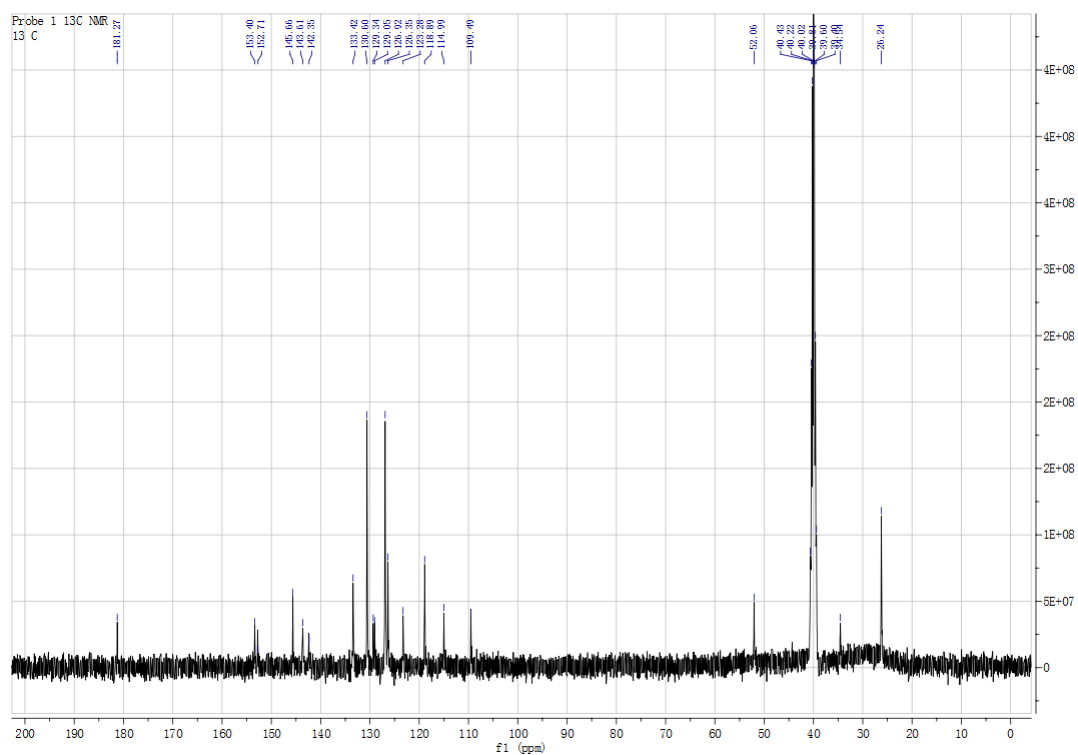

Fig. S2. <sup>13</sup>C NMR spectrum of probe 1 in DMSO-d<sub>6</sub>.

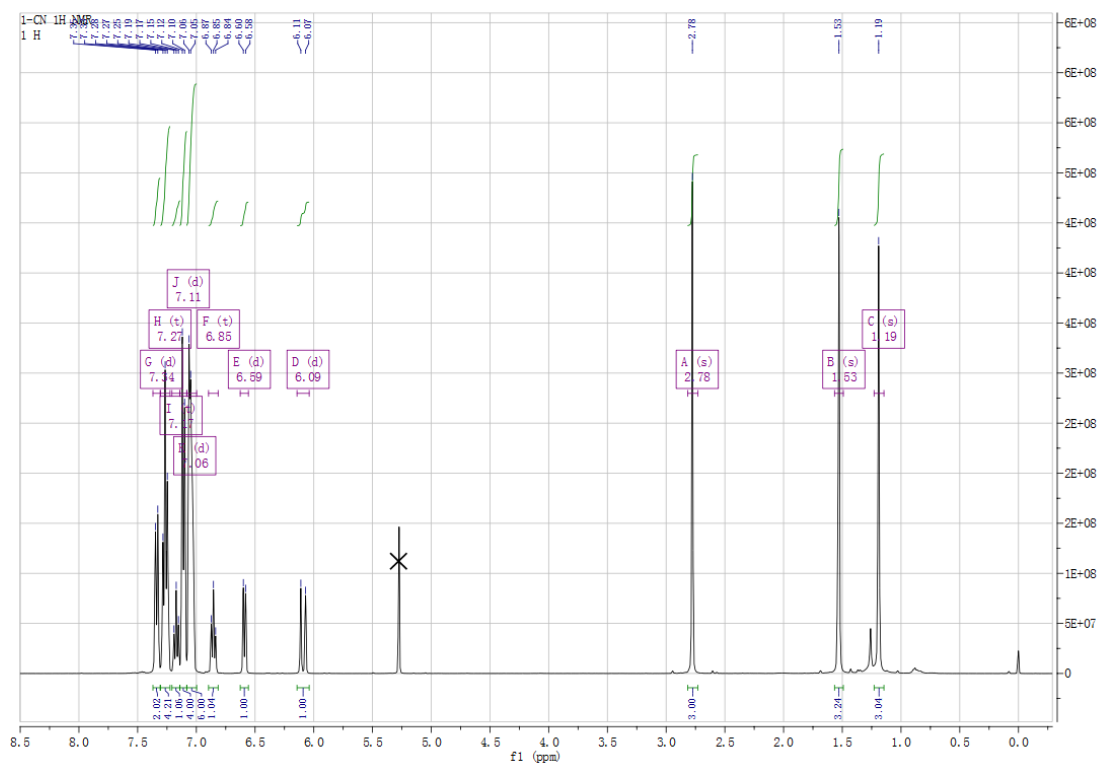

Fig. S3.  $^1\text{H}$  NMR spectrum of **1-CN** in  $\text{CDCl}_3$ .

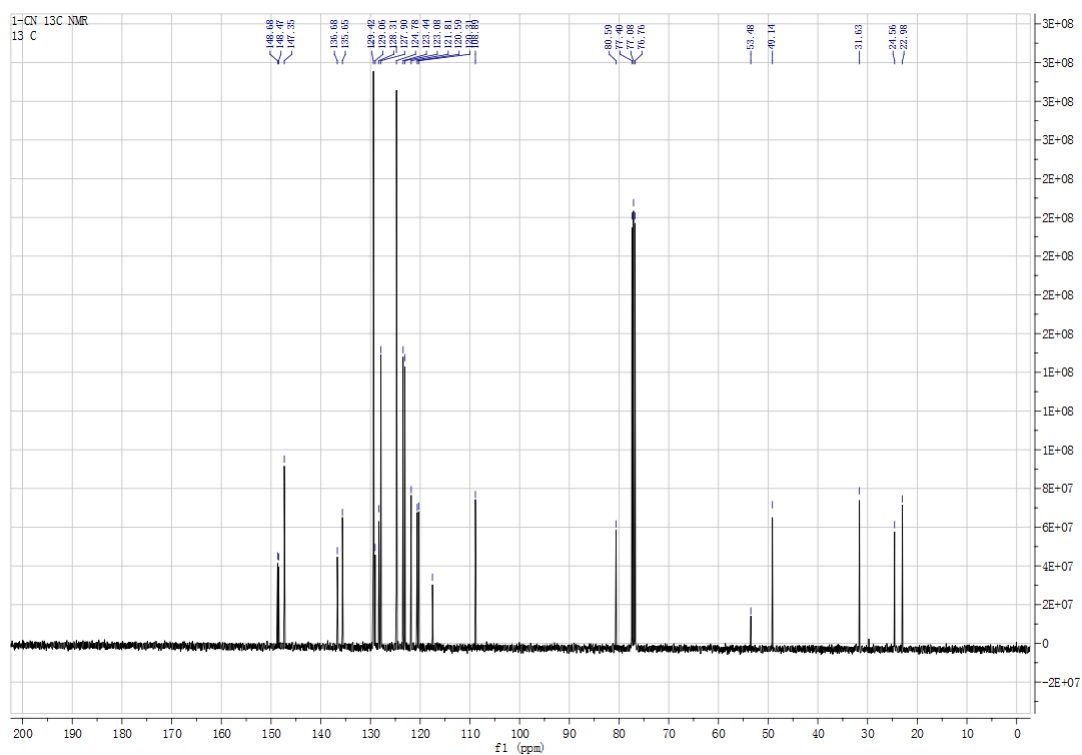

Fig. S4.  $^{13}\text{C}$  NMR spectrum of **1-CN** in  $\text{CDCl}_3$ .

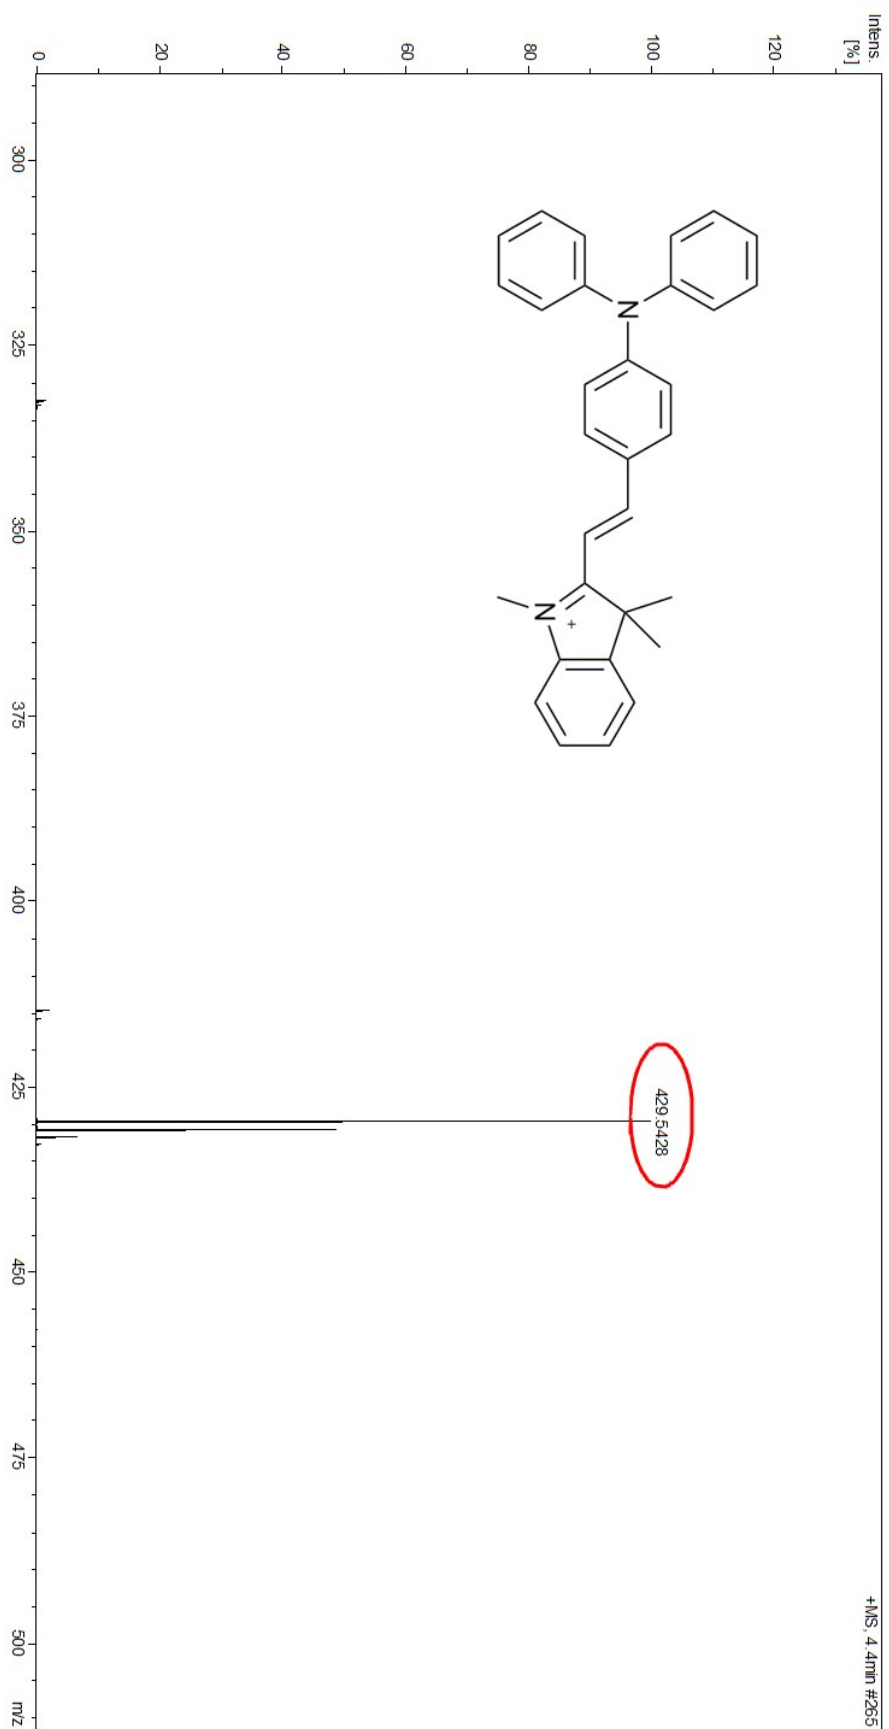

**Fig. S5.** The HRMS Spectra of probe 1.

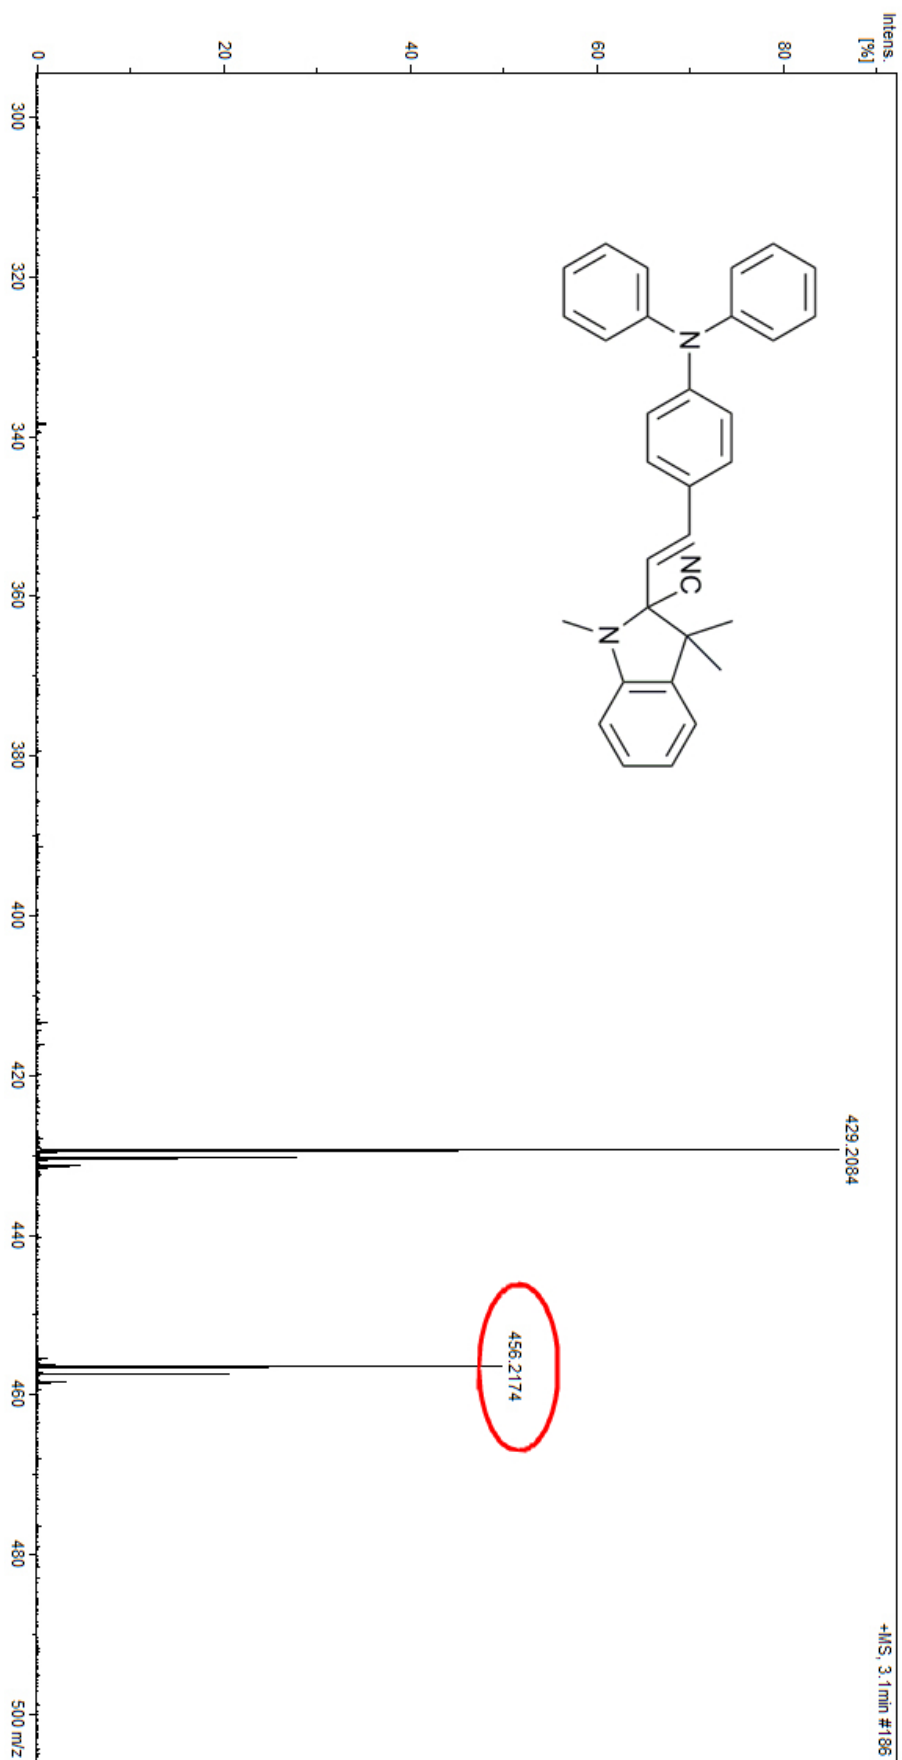

**Fig. S6.** The HRMS Spectra of **1-CN**.

## 2、Supplemental spectra and data

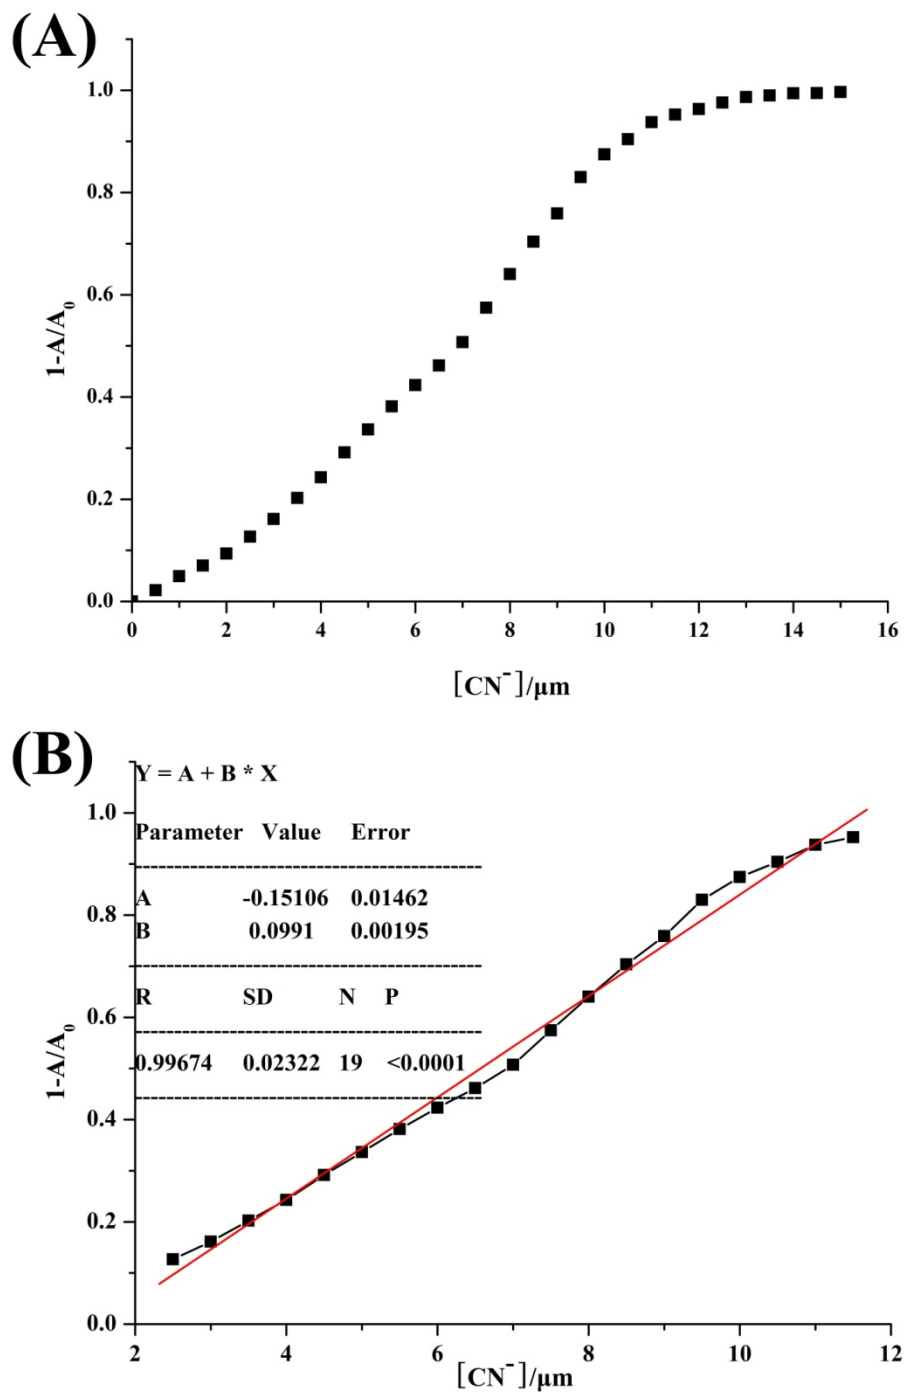

**Fig. S7.** (A):  $(1-A/A_0)$  plots of probe **1** ( $5.0 \mu\text{M}$ ) at  $532 \text{ nm}$  vs. the concentration of  $\text{CN}^-$ ; (B) shows the linear relation for concentration of  $\text{CN}^-$  in the range of  $2.5\text{-}11.5 \mu\text{M}$ .

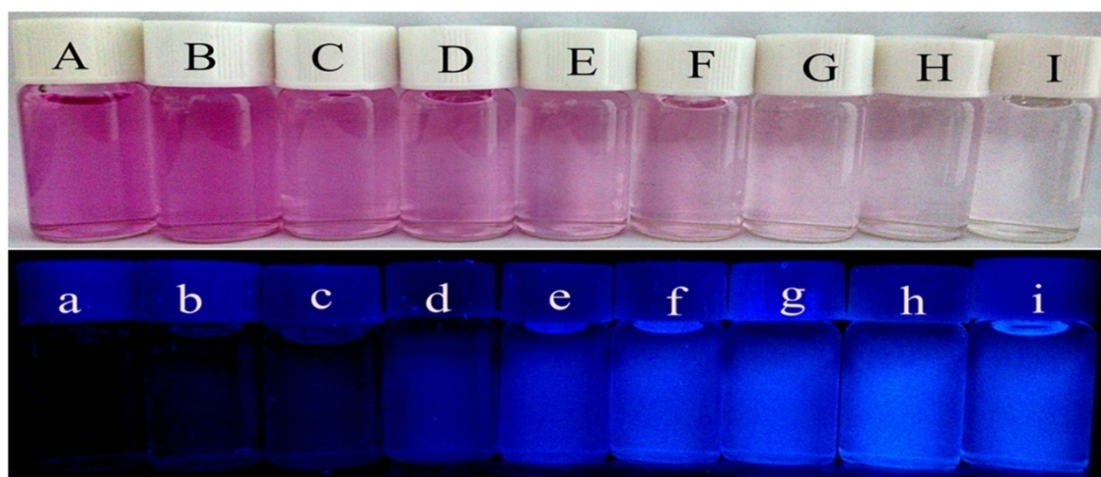

**Fig. S8.** Color fading (up) and fluorescence increasing (down) of probe **1** ( $5.0 \mu\text{M}$ ) with the gradual addition of  $\text{CN}^-$  (from left to right:  $0 \mu\text{M}$ ,  $2.0 \mu\text{M}$ ,  $4.0 \mu\text{M}$ ,  $6.0 \mu\text{M}$ ,  $8.0 \mu\text{M}$ ,  $10.0 \mu\text{M}$ ,  $12.0 \mu\text{M}$ ,  $14.0 \mu\text{M}$ ).

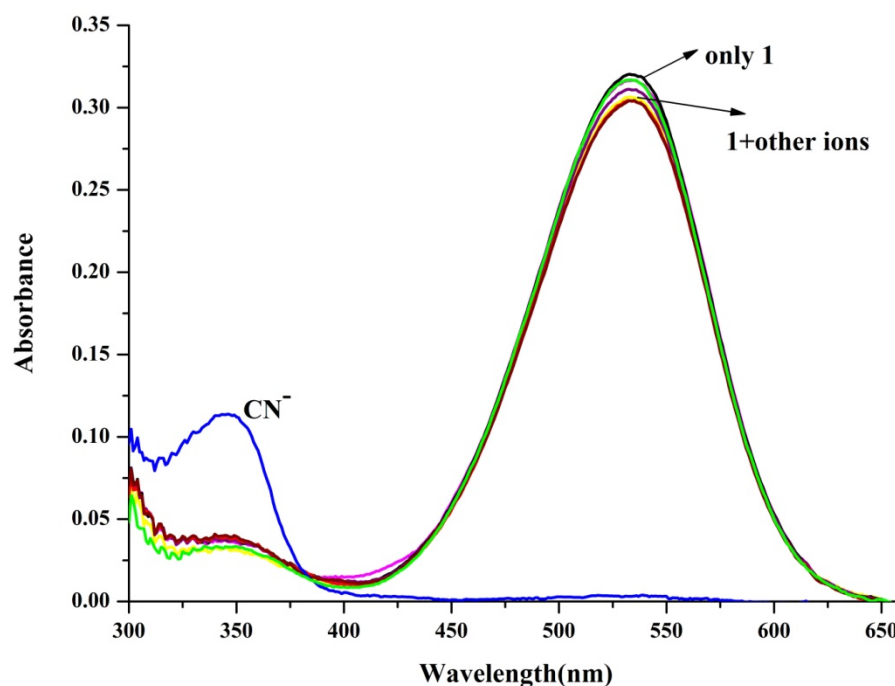

**Fig. S9.** Absorption spectra spectra of **1** ( $5.0 \mu\text{M}$ ) with various analytes in EtOH-Tris·HCl buffer ( $10.0 \text{ mM}$ ,  $\text{PH}=7.4$ ,  $4:6$ , v/v).  $\lambda_{\text{ex}}=345 \text{ nm}$ , slits:  $5 \text{ nm}/2.5 \text{ nm}$ .

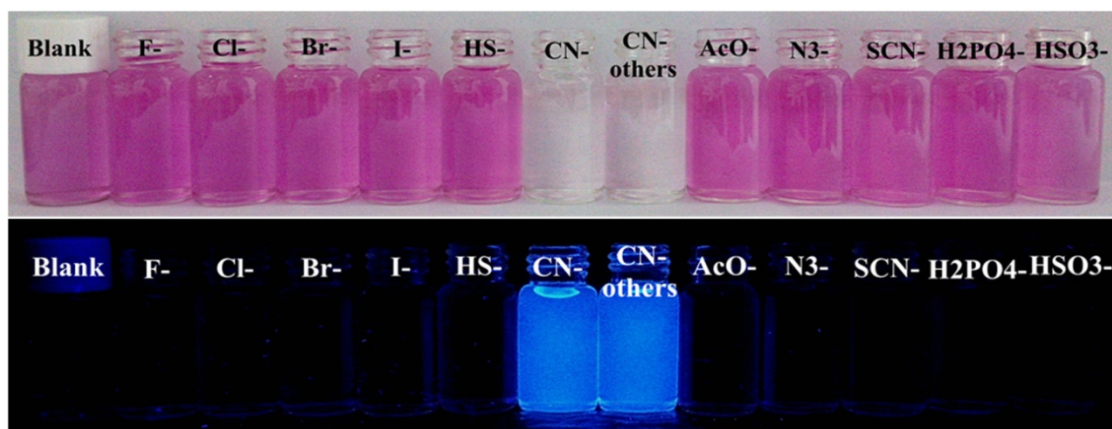

**Fig. S10.** Colorimetric (up) and fluorescent changes (down) of probe **1** (5.0  $\mu\text{M}$ ) in the presence of  $\text{CN}^-$  (15.0  $\mu\text{M}$ ) and 10.0 equiv. of other anions.

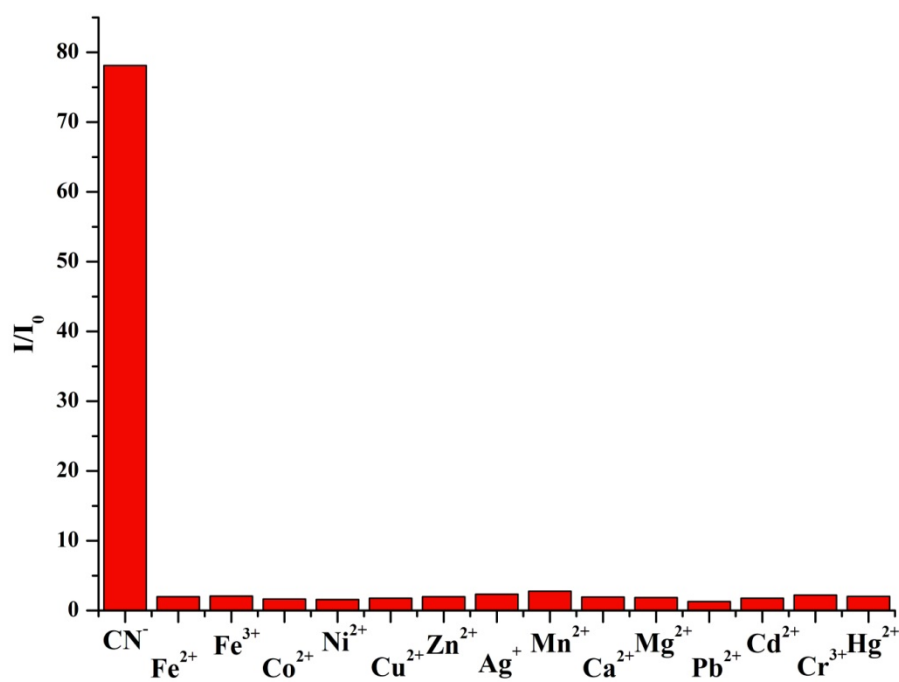

**Fig. S11.** Variation of the relative fluorescence intensity at 445 nm of **1** (5.0  $\mu\text{M}$ ) in the presence of  $\text{CN}^-$  (15.0  $\mu\text{M}$ ) and metal ions ( $\text{Fe}^{2+}$ ,  $\text{Fe}^{3+}$ ,  $\text{Co}^{2+}$ ,  $\text{Ni}^{2+}$ ,  $\text{Cu}^{2+}$ ,  $\text{Zn}^{2+}$ ,  $\text{Ag}^+$ ,  $\text{Mn}^{2+}$ ,  $\text{Ca}^{2+}$ ,  $\text{Mg}^{2+}$ ,  $\text{Pb}^{2+}$ ,  $\text{Cd}^{2+}$ ,  $\text{Cr}^{3+}$ ,  $\text{Hg}^{2+}$ ), respectively; the concentration of each metal ion except  $\text{CN}^-$  was 150.0  $\mu\text{M}$ ; all solutions were prepared in aqueous solution and excitation wavelength was 345 nm.



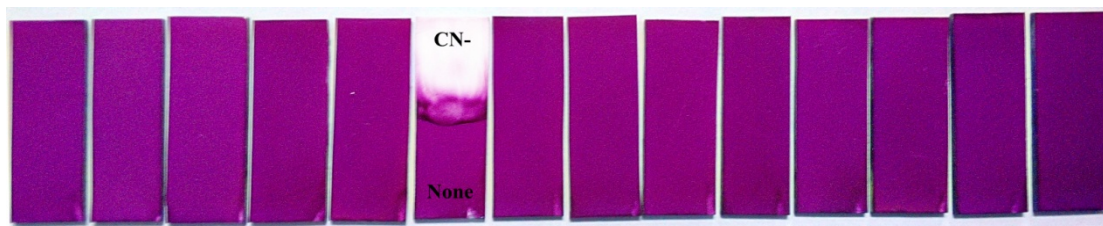

**Fig. S12.** Photograph of the TLC plates towards various anions. (from left to right :  $F^-$ ,  $Cl^-$ ,  $Br^-$ ,  $I^-$ ,  $NO_3^-$ ,  $CN^-$ ,  $SO_4^{2-}$ ,  $HS^-$ ,  $AcO^-$ ,  $N_3^-$ ,  $SCN^-$ ,  $H_2PO_4^-$ ,  $HPO_4^{2-}$ ,  $HSO_3^-$ ).

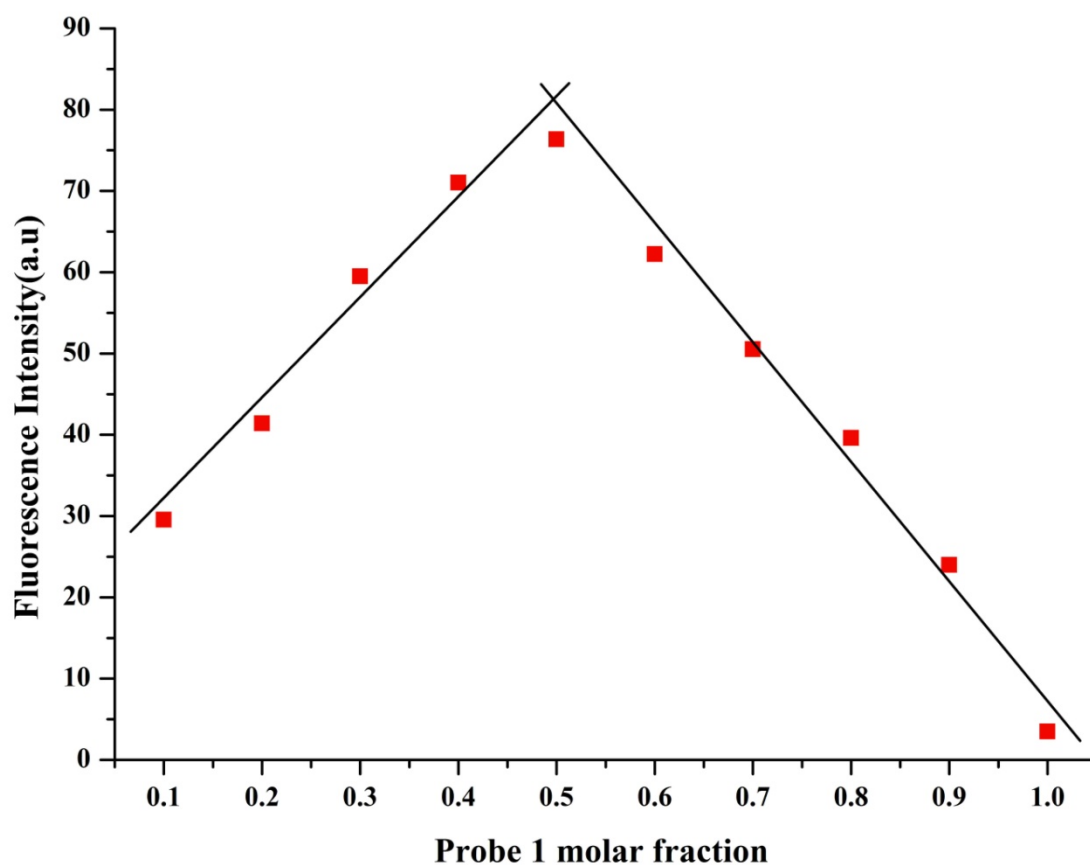

**Fig. S13.** Job's plot for determining the binding stoichiometry of probe **1** and  $CN^-$  in EtOH-Tris·HCl buffer (10 mM, pH = 7.4, 4:6, v/v). The total concentration of probe **1** and  $CN^-$  was 10  $\mu$ M.

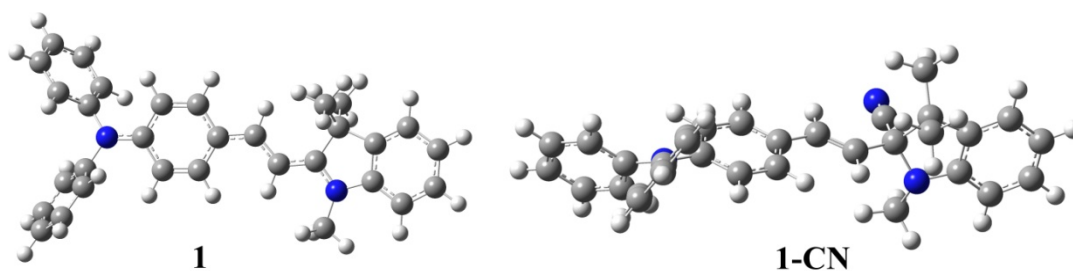

**Fig. S14.** The optimized structures of **1** and **1-CN**.

**Fig. S15.** The calculated results of transitions with oscillator strength above 0.1.

**Absorption of 1:**

|                   |           |           |           |          |
|-------------------|-----------|-----------|-----------|----------|
| Excited State 1:  | Singlet-A | 2.3566 eV | 526.12 nm | f=1.3456 |
| 114 ->115         | 0.70508   |           |           |          |
| Excited State 2:  | Singlet-A | 3.1100 eV | 398.67 nm | f=0.2143 |
| 112 ->115         | 0.17873   |           |           |          |
| 113 ->115         | 0.67434   |           |           |          |
| Excited State 12: | Singlet-A | 4.5970 eV | 269.71 nm | f=0.1241 |
| 114 ->119         | 0.68715   |           |           |          |

**Absorption of 1-CN:**

|                   |           |           |           |          |
|-------------------|-----------|-----------|-----------|----------|
| Excited State 1:  | Singlet-A | 3.4697 eV | 357.33 nm | f=0.7646 |
| 121 ->122         | 0.69727   |           |           |          |
| Excited State 4:  | Singlet-A | 4.0622 eV | 305.21 nm | f=0.1859 |
| 121 ->123         | 0.13536   |           |           |          |
| 121 ->124         | 0.68326   |           |           |          |
| Excited State 14: | Singlet-A | 5.0546 eV | 245.29 nm | f=0.2774 |
| 117 ->122         | -0.15658  |           |           |          |
| 119 ->122         | -0.37022  |           |           |          |
| 120 ->128         | -0.33933  |           |           |          |
| 120 ->129         | -0.11884  |           |           |          |
| 121 ->129         | 0.37620   |           |           |          |
| Excited State 23: | Singlet-A | 5.5187 eV | 224.66 nm | f=0.1001 |
| 114 ->122         | -0.27852  |           |           |          |
| 114 ->127         | 0.10356   |           |           |          |
| 115 ->122         | -0.25972  |           |           |          |
| 116 ->124         | 0.29271   |           |           |          |
| 119 ->123         | 0.34187   |           |           |          |
| 119 ->124         | 0.24322   |           |           |          |
| 119 ->126         | 0.17366   |           |           |          |
| Excited State 30: | Singlet-A | 5.8485 eV | 211.99 nm | f=0.1084 |
| 115 ->124         | -0.15762  |           |           |          |
| 117 ->123         | 0.57946   |           |           |          |
| 117 ->124         | 0.15690   |           |           |          |
| 120 ->130         | 0.15385   |           |           |          |

120 ->131 -0.19057  
121 ->132 -0.10079

**Emission of 1-CN:**

|                  |           |           |           |          |
|------------------|-----------|-----------|-----------|----------|
| Excited State 1: | Singlet-A | 2.5499 eV | 486.23 nm | f=0.0559 |
| 121 ->122        | 0.70349   |           |           |          |
| Excited State 4: | Singlet-A | 4.2048 eV | 294.87 nm | f=0.1331 |
| 116 ->122        | 0.17000   |           |           |          |
| 121 ->124        | 0.57719   |           |           |          |
| 121 ->126        | -0.34333  |           |           |          |
| Excited State 5: | Singlet-A | 4.2629 eV | 290.85 nm | f=0.6503 |
| 116 ->122        | -0.19440  |           |           |          |
| 117 ->122        | -0.24969  |           |           |          |
| 118 ->122        | 0.19509   |           |           |          |
| 119 ->122        | 0.58081   |           |           |          |
| 121 ->126        | -0.10523  |           |           |          |
| Excited State 7: | Singlet-A | 4.3464 eV | 285.26 nm | f=0.1369 |
| 117 ->122        | 0.15197   |           |           |          |
| 118 ->122        | 0.60850   |           |           |          |
| 119 ->122        | -0.18268  |           |           |          |
| 121 ->124        | -0.14161  |           |           |          |
| 121 ->126        | -0.19659  |           |           |          |
| Excited State 8: | Singlet-A | 4.3875 eV | 282.59 nm | f=0.1975 |
| 116 ->122        | -0.24123  |           |           |          |
| 117 ->122        | 0.49644   |           |           |          |
| 119 ->122        | 0.14783   |           |           |          |
| 121 ->124        | 0.26668   |           |           |          |
| 121 ->126        | 0.26327   |           |           |          |
| Excited State 9: | Singlet-A | 4.4322 eV | 279.73 nm | f=0.4104 |
| 115 ->122        | 0.12108   |           |           |          |
| 116 ->122        | 0.48936   |           |           |          |
| 117 ->122        | 0.32264   |           |           |          |
| 119 ->122        | 0.28516   |           |           |          |
| 121 ->124        | -0.17009  |           |           |          |
| 121 ->126        | -0.11295  |           |           |          |
